# Supplementary material for: Peptidoglycan synthesis drives a single population of septal cell wall synthases during division in Bacillus subtilis
Source: PubMed Central journal article supplement (PMC10994842; doi:10.1038/s41564-024-01650-9), 2024-03-13
Supplement: 41564_2024_1650_MOESM1_ESM.pdf [file 41564_2024_1650_MOESM1_ESM.pdf]

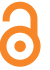

# Peptidoglycan synthesis drives a single population of septal cell wall synthases during division in *Bacillus subtilis*

---

In the format provided by the authors and unedited

## 1 SUPPLEMENTARY FIGURES

2

a

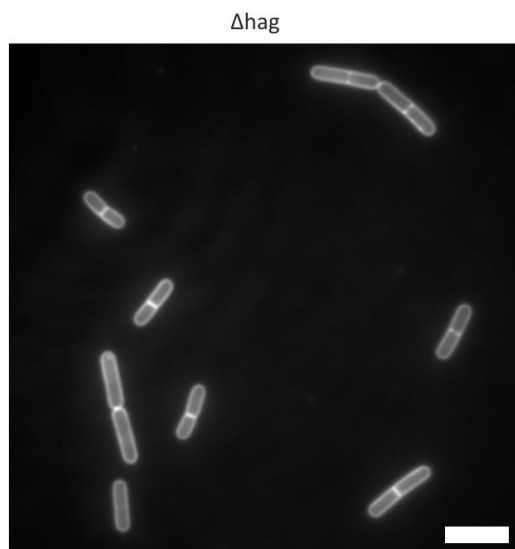

b

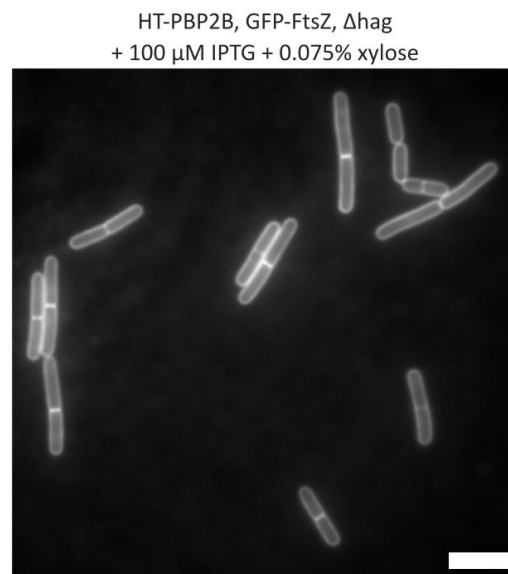

3

c

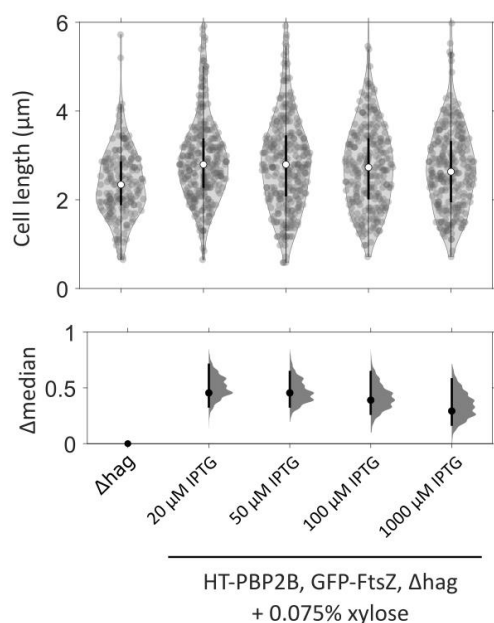

d

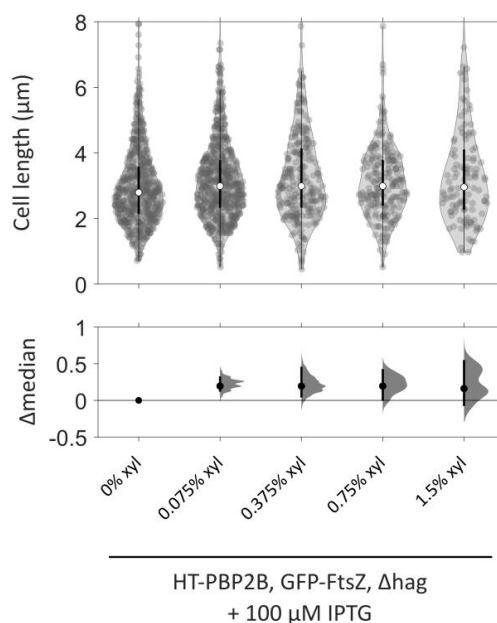4 **Supplementary Figure 1. Effect of HT-PBP2B and GFP-FtsZ induction levels on cell morphology.**

5 Lengths of HT-PBP2B GFP-FtsZ  $\Delta$ hag cells (strain SH147) were measured by microscopy of Nile Red-  
 6 stained cells and compared to those of  $\Delta$ hag cells (strain SH211) (Supplementary Table 1). Both strains  
 7 were grown in PHMM at 30°C. **(a)** Micrograph of  $\Delta$ hag cells. **(b)** Micrograph of HT-PBP2B, GFP-FtsZ,  
 8  $\Delta$ hag cells with 100  $\mu$ M IPTG and 0.075% xylose (standard experimental conditions). **(c)** HT-PBP2B  
 9 expression was induced at the level specified by the [IPTG] shown, while GFP-FtsZ levels were held  
 10 constant (0.075% xylose induction). **(d)** GFP-FtsZ expression was induced at the level specified by the  
 11 [xyl] concentration shown, while the HT-PBP2B levels were held constant (100  $\mu$ M IPTG induction).  
 12 Violin plots: white circles, median; thick black lines, interquartile range; thin black lines, 1.5x  
 13 interquartile range. DABEST plots: black circle, median difference between indicated conditions; black  
 14 lines, 95% confidence interval of median difference. Scale bars: 5  $\mu$ m. Sample sizes are listed in  
 15 Supplementary Table 6.

16

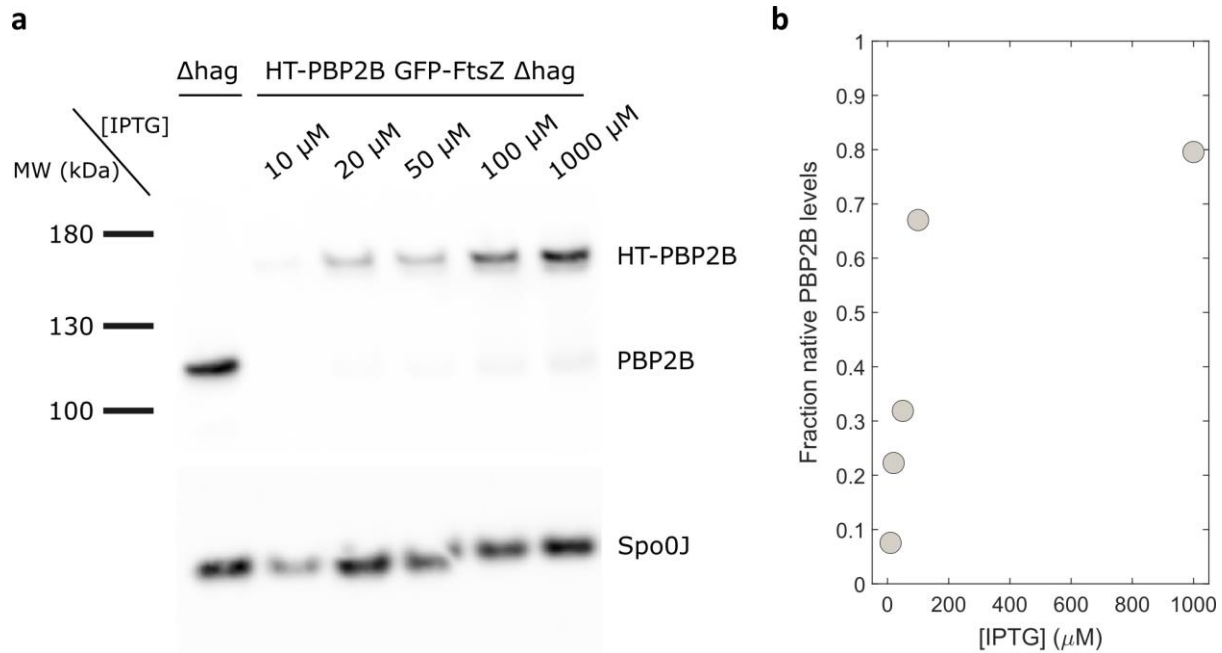

18 **Supplementary Figure 2. Quantification of PBP2B levels across [IPTG].** (a) Western blot of HT-PBP2B  
 19 GFP-FtsZ Δhag (strain SH147; Supplementary Table 1) and Δhag (strain SH211). Cultures were grown  
 20 in rich media at 37°C with varying [IPTG] to induce HT-PBP2B expression. 5 μg of total protein from  
 21 lysate was blotted. Spo0J was used as a loading control on a separate blot. The membranes were  
 22 incubated with polyclonal antibodies specific for PBP2B or Spo0J. Bands were visualised by a  
 23 chemiluminescence system. (b) Protein expression levels of HT-PBP2B across [IPTG] based on the  
 24 normalized integrated intensities of bands in the Western blot. Sample sizes are listed in  
 25 Supplementary Table 6. Uncropped images are provided as Supplementary Figure 12.

26

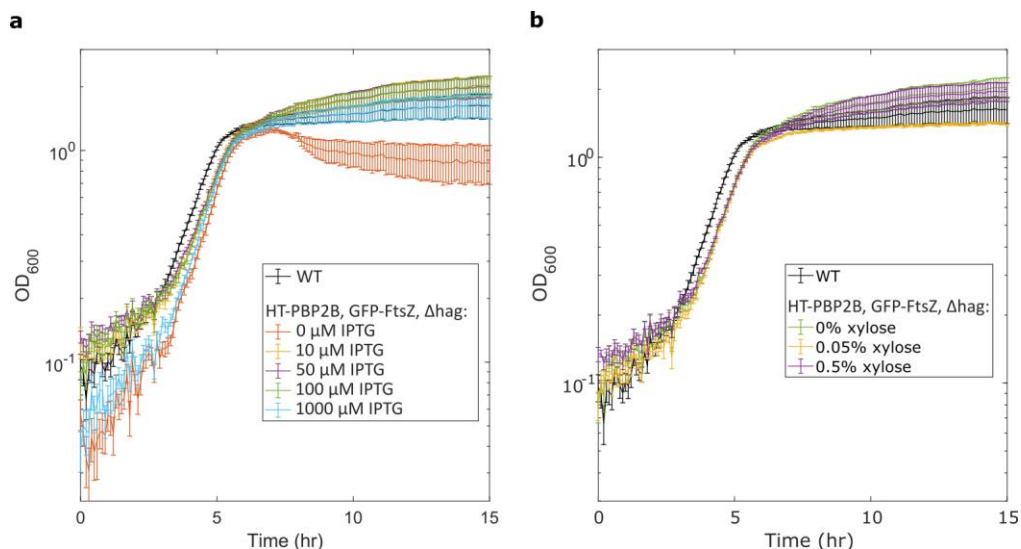

28 **Supplementary Figure 3. Effect of HT-PBP2B and GFP-FtsZ induction on growth in liquid culture.**  
 29 Growth of HT-PBP2B GFP-FtsZ Δhag cultures (strain SH147) was monitored for 15 hours using a  
 30 FLUOStar OPTIMA plate reader (BMG Labtech) and compared to that of wild-type (PY79)  
 31 (Supplementary Table 1). Both strains were grown in LB at 30°C. Mean values ± SD of triplicate repeats  
 32 are plotted. (a) HT-PBP2B expression was induced at the level specified by the [IPTG] shown, while  
 33 GFP-FtsZ was not induced (0% xylose). (b) GFP-FtsZ expression was induced at the level specified by  
 34 the [xylose] shown, while HT-PBP2B expression was induced with a constant 100 μM IPTG.

35

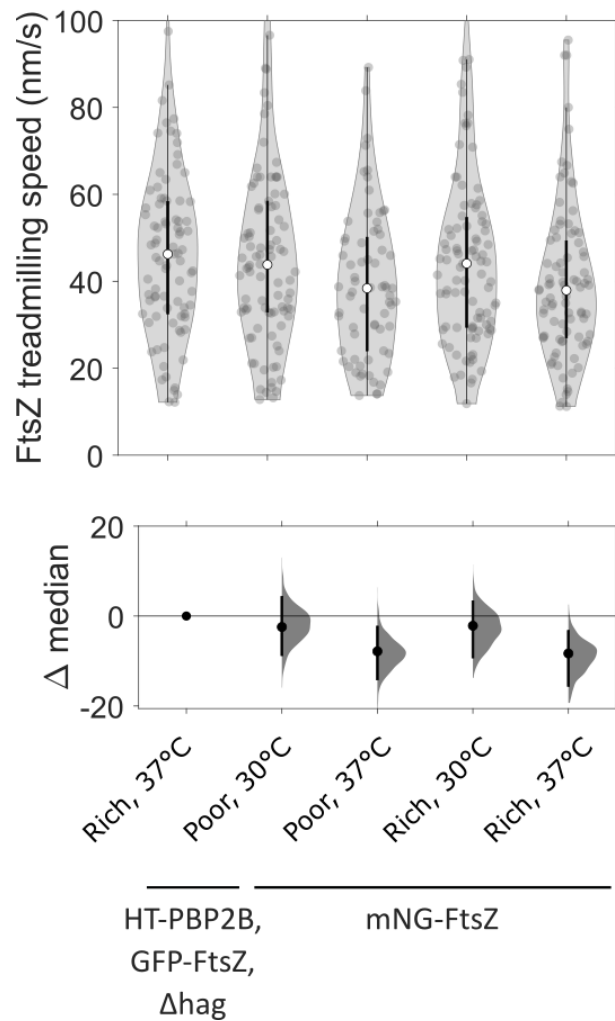

36

37

38

39

40

41

42

43

44

45

46

47

48

49

**Supplementary Figure 4. Speed of FtsZ treadmilling in HT-PBP2B, GFP-FtsZ,  $\Delta$ hag strain compared to previous measurements.** FtsZ treadmilling speeds were measured by TIRF microscopy using a HT-PBP2B, GFP-FtsZ,  $\Delta$ hag strain (strain SH147; Supplementary Table 1) and compared to treadmilling speeds in a strain expressing mNeonGreen-FtsZ (mNG-FtsZ) from an IPTG-inducible promoter (strain bWM4; Supplementary Table 1) measured across different growth conditions (poor vs. rich media, 30°C vs. 37 °C). HT-PBP2B, GFP-FtsZ,  $\Delta$ hag cultures were grown in rich media (PHMM) at 37°C with 0.075% xylose to induce a low level of GFP-FtsZ expression. Treadmilling speeds were determined by manually tracing filament trajectories on kymographs, as done previously<sup>1</sup>. Data for all mNG-FtsZ conditions are taken from Whitley et al<sup>1</sup>. Violin plots: white circles, median; thick black lines, interquartile range; thin black lines, 1.5x interquartile range. DABEST plots: black circle, median difference between indicated conditions; black lines, 95% confidence interval of median difference. Sample sizes are listed in Supplementary Table 6.

50

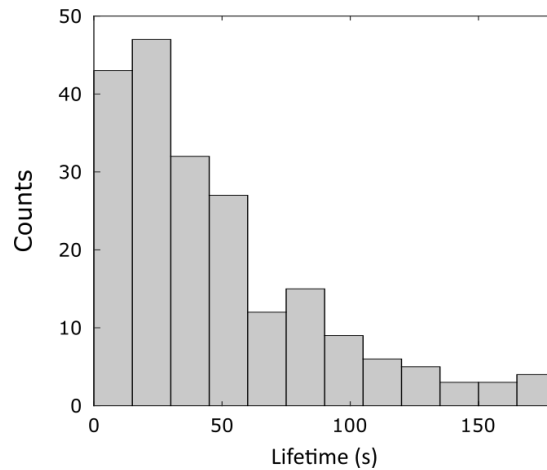

51

52

53

54

55

56

**Supplementary Figure 5. Lifetime of immobile HT-PBP2B tracks.** Histogram of lifetimes for immobile track segments from HT-PBP2B GFP-FtsZ  $\Delta$ hag cells (strain SH147) grown in PHMM at 30°C. Here, immobile is defined as a track segment with speed less than 4 nm/s. Sample sizes are listed in Supplementary Table 6.

57

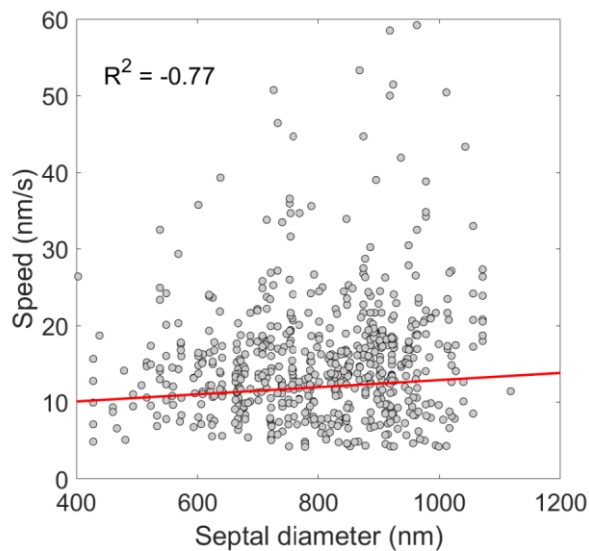

58

59

60

61

62

**Supplementary Figure 6. Correlation between HT-PBP2B speed and septal diameter.** Scatter plots showing the speeds of processive HT-PBP2B track segments (speeds between 4 and 60 nm/s) and the associated diameters of the septa around which they were moving under our standard conditions (rich media, 30°C).

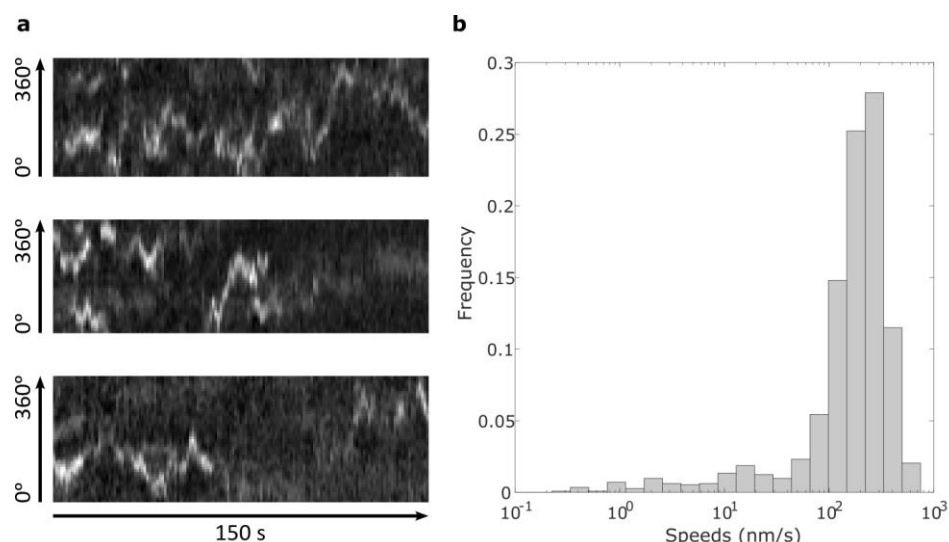

63

64 **Supplementary Figure 7. Motion of HT-PBP2B molecules outside the septal ring area. (a)** Example  
 65 radial kymographs of HT-PBP2B (rich media, 30°C) showing motion outside the septal ring area (*i.e.* at  
 66 a random section of the cell sidewall). **(b)** Histogram of HT-PBP2B speeds for molecules observed  
 67 outside the septal ring area plotted on logarithmic x axis, measured from linear segments on kymographs.  
 68  
 69

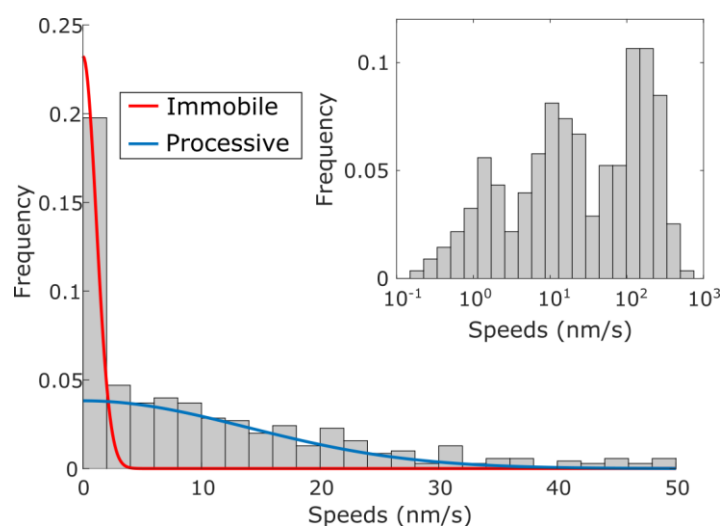

70

71  
 72 **Supplementary Figure 8. Speeds of HT-PBP2B molecules with high inducer concentration.** Histogram  
 73 of HT-PBP2B speeds in HT-PBP2B GFP-FtsZ  $\Delta$ hag cells (strain SH147; Supplementary Table 1) grown in  
 74 rich media with 1 mM IPTG and 0.075% xylose at 30°C with 250-500 pM JFX554 HaloTag ligand and  
 75 imaged using VerCINI. Red and blue lines show fits to the data. *Inset:* Histogram of speeds plotted on  
 76 logarithmic x axis, showing three populations.  
 77

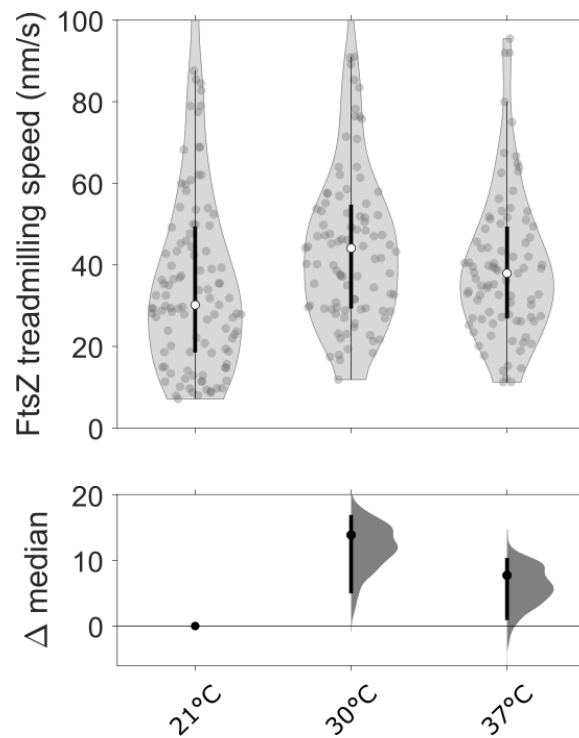

78

79

80

81

82

83

84

85

86

87

88

89

**Supplementary Figure 9. Effect of temperature on FtsZ treadmilling speed.** FtsZ treadmilling speeds were measured by TIRF microscopy using a strain expressing mNeonGreen-FtsZ from an IPTG-inducible promoter (strain bWM4; Supplementary Table 1) grown in rich media at 21°C and compared to previous measurements of the same strain in the same media under varying temperatures. Cultures were incubated with 25  $\mu$ M IPTG 1 hr prior to imaging to induce mNeonGreen-FtsZ expression. Treadmilling speeds were determined by manually tracing filament trajectories on kymographs, as done previously<sup>1</sup>. Data for 30°C and 37°C are taken from Whitley et al. 2021<sup>1</sup>. Violin plots: white circles, median; thick black lines, interquartile range; thin black lines, 1.5x interquartile range. DABEST plots: black circle, median difference between indicated conditions; black lines, 95% confidence interval of median difference. Sample sizes are listed in Supplementary Table 6.

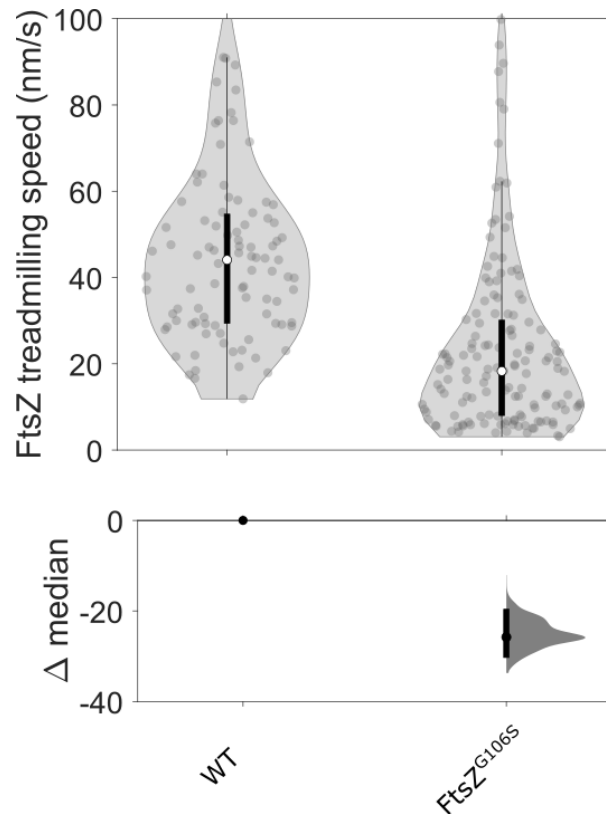

90

91

**Supplementary Figure 10. Effect of FtsZ<sup>G106S</sup> mutation on treadmilling speed.** FtsZ treadmilling speeds were measured for cells expressing FtsZ<sup>G106S</sup> (strain SH203; Supplementary Table 1) in rich media at 30°C and compared to treadmilling speeds in a strain expressing mNeonGreen-FtsZ from an IPTG-inducible promoter (strain bWM4) measured under the same conditions. FtsZ<sup>G106S</sup> cells were incubated with 0.075% xylose to induce GFP-FtsZ expression. Treadmilling speeds were determined by manually tracing filament trajectories on kymographs, as done previously<sup>1</sup>. Data for WT are taken from Whitley et al. 2021<sup>1</sup>. Violin plots: white circles, median; thick black lines, interquartile range; thin black lines, 1.5x interquartile range. DABEST plots: black circle, median difference between indicated conditions; black lines, 95% confidence interval of median difference. Sample sizes are listed in Supplementary Table 6.

100

101

102

103



104

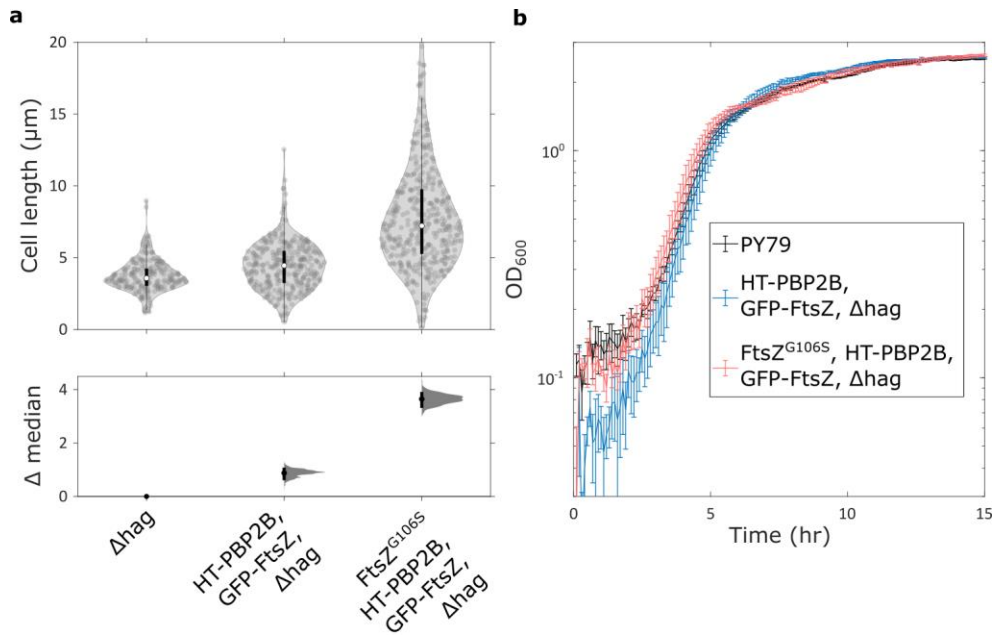

105

**Supplementary Figure 11. Effect of FtsZ<sup>G106S</sup> mutation on cell lengths and growth in liquid culture.**

106

**(a)** Lengths of FtsZ<sup>G106S</sup> HT-PBP2B GFP-FtsZ Δhag cells (strain SH203) were measured by microscopy of Nile Red-stained cells and compared to those of HT-PBP2B GFP-FtsZ Δhag and Δhag cells (strains SH147

and SH211, respectively). All strains were grown in PHMM at 30°C. HT-PBP2B expression was induced with 100 μM IPTG in both strains containing HT-PBP2B, while GFP-FtsZ was not induced in either case (0% xylose). Violin plots: white circles, median; thick black lines, interquartile range; thin black lines, 1.5x interquartile range. DABEST plots: black circle, median difference between indicated conditions; black lines, 95% confidence interval of median difference. Sample sizes are listed in Supplementary Table 6. **(b)** Growth was monitored for 15 hours using a FLUOStar OPTIMA plate reader (BMG Labtech) at 30°C. Mean values ± SD of triplicate repeats are plotted. All strains were grown in LB at 30°C. HT-PBP2B expression was induced with 100 μM IPTG in both strains containing HT-PBP2B, while GFP-FtsZ was not induced in either case (0% xylose).

109 with 100 μM IPTG in both strains containing HT-PBP2B, while GFP-FtsZ was not induced in either case (0% xylose). Violin plots: white circles, median; thick black lines, interquartile range; thin black lines, 1.5x interquartile range. DABEST plots: black circle, median difference between indicated conditions; black lines, 95% confidence interval of median difference. Sample sizes are listed in Supplementary Table 6. **(b)** Growth was monitored for 15 hours using a FLUOStar OPTIMA plate reader (BMG Labtech) at 30°C. Mean values ± SD of triplicate repeats are plotted. All strains were grown in LB at 30°C. HT-PBP2B expression was induced with 100 μM IPTG in both strains containing HT-PBP2B, while GFP-FtsZ was not induced in either case (0% xylose).

110 with 100 μM IPTG in both strains containing HT-PBP2B, while GFP-FtsZ was not induced in either case (0% xylose). Violin plots: white circles, median; thick black lines, interquartile range; thin black lines, 1.5x interquartile range. DABEST plots: black circle, median difference between indicated conditions; black lines, 95% confidence interval of median difference. Sample sizes are listed in Supplementary Table 6. **(b)** Growth was monitored for 15 hours using a FLUOStar OPTIMA plate reader (BMG Labtech) at 30°C. Mean values ± SD of triplicate repeats are plotted. All strains were grown in LB at 30°C. HT-PBP2B expression was induced with 100 μM IPTG in both strains containing HT-PBP2B, while GFP-FtsZ was not induced in either case (0% xylose).

111 with 100 μM IPTG in both strains containing HT-PBP2B, while GFP-FtsZ was not induced in either case (0% xylose). Violin plots: white circles, median; thick black lines, interquartile range; thin black lines, 1.5x interquartile range. DABEST plots: black circle, median difference between indicated conditions; black lines, 95% confidence interval of median difference. Sample sizes are listed in Supplementary Table 6. **(b)** Growth was monitored for 15 hours using a FLUOStar OPTIMA plate reader (BMG Labtech) at 30°C. Mean values ± SD of triplicate repeats are plotted. All strains were grown in LB at 30°C. HT-PBP2B expression was induced with 100 μM IPTG in both strains containing HT-PBP2B, while GFP-FtsZ was not induced in either case (0% xylose).

112 with 100 μM IPTG in both strains containing HT-PBP2B, while GFP-FtsZ was not induced in either case (0% xylose). Violin plots: white circles, median; thick black lines, interquartile range; thin black lines, 1.5x interquartile range. DABEST plots: black circle, median difference between indicated conditions; black lines, 95% confidence interval of median difference. Sample sizes are listed in Supplementary Table 6. **(b)** Growth was monitored for 15 hours using a FLUOStar OPTIMA plate reader (BMG Labtech) at 30°C. Mean values ± SD of triplicate repeats are plotted. All strains were grown in LB at 30°C. HT-PBP2B expression was induced with 100 μM IPTG in both strains containing HT-PBP2B, while GFP-FtsZ was not induced in either case (0% xylose).

113 with 100 μM IPTG in both strains containing HT-PBP2B, while GFP-FtsZ was not induced in either case (0% xylose). Violin plots: white circles, median; thick black lines, interquartile range; thin black lines, 1.5x interquartile range. DABEST plots: black circle, median difference between indicated conditions; black lines, 95% confidence interval of median difference. Sample sizes are listed in Supplementary Table 6. **(b)** Growth was monitored for 15 hours using a FLUOStar OPTIMA plate reader (BMG Labtech) at 30°C. Mean values ± SD of triplicate repeats are plotted. All strains were grown in LB at 30°C. HT-PBP2B expression was induced with 100 μM IPTG in both strains containing HT-PBP2B, while GFP-FtsZ was not induced in either case (0% xylose).

114 with 100 μM IPTG in both strains containing HT-PBP2B, while GFP-FtsZ was not induced in either case (0% xylose). Violin plots: white circles, median; thick black lines, interquartile range; thin black lines, 1.5x interquartile range. DABEST plots: black circle, median difference between indicated conditions; black lines, 95% confidence interval of median difference. Sample sizes are listed in Supplementary Table 6. **(b)** Growth was monitored for 15 hours using a FLUOStar OPTIMA plate reader (BMG Labtech) at 30°C. Mean values ± SD of triplicate repeats are plotted. All strains were grown in LB at 30°C. HT-PBP2B expression was induced with 100 μM IPTG in both strains containing HT-PBP2B, while GFP-FtsZ was not induced in either case (0% xylose).

115 with 100 μM IPTG in both strains containing HT-PBP2B, while GFP-FtsZ was not induced in either case (0% xylose). Violin plots: white circles, median; thick black lines, interquartile range; thin black lines, 1.5x interquartile range. DABEST plots: black circle, median difference between indicated conditions; black lines, 95% confidence interval of median difference. Sample sizes are listed in Supplementary Table 6. **(b)** Growth was monitored for 15 hours using a FLUOStar OPTIMA plate reader (BMG Labtech) at 30°C. Mean values ± SD of triplicate repeats are plotted. All strains were grown in LB at 30°C. HT-PBP2B expression was induced with 100 μM IPTG in both strains containing HT-PBP2B, while GFP-FtsZ was not induced in either case (0% xylose).

116 with 100 μM IPTG in both strains containing HT-PBP2B, while GFP-FtsZ was not induced in either case (0% xylose). Violin plots: white circles, median; thick black lines, interquartile range; thin black lines, 1.5x interquartile range. DABEST plots: black circle, median difference between indicated conditions; black lines, 95% confidence interval of median difference. Sample sizes are listed in Supplementary Table 6. **(b)** Growth was monitored for 15 hours using a FLUOStar OPTIMA plate reader (BMG Labtech) at 30°C. Mean values ± SD of triplicate repeats are plotted. All strains were grown in LB at 30°C. HT-PBP2B expression was induced with 100 μM IPTG in both strains containing HT-PBP2B, while GFP-FtsZ was not induced in either case (0% xylose).

117 with 100 μM IPTG in both strains containing HT-PBP2B, while GFP-FtsZ was not induced in either case (0% xylose). Violin plots: white circles, median; thick black lines, interquartile range; thin black lines, 1.5x interquartile range. DABEST plots: black circle, median difference between indicated conditions; black lines, 95% confidence interval of median difference. Sample sizes are listed in Supplementary Table 6. **(b)** Growth was monitored for 15 hours using a FLUOStar OPTIMA plate reader (BMG Labtech) at 30°C. Mean values ± SD of triplicate repeats are plotted. All strains were grown in LB at 30°C. HT-PBP2B expression was induced with 100 μM IPTG in both strains containing HT-PBP2B, while GFP-FtsZ was not induced in either case (0% xylose).

118 with 100 μM IPTG in both strains containing HT-PBP2B, while GFP-FtsZ was not induced in either case (0% xylose). Violin plots: white circles, median; thick black lines, interquartile range; thin black lines, 1.5x interquartile range. DABEST plots: black circle, median difference between indicated conditions; black lines, 95% confidence interval of median difference. Sample sizes are listed in Supplementary Table 6. **(b)** Growth was monitored for 15 hours using a FLUOStar OPTIMA plate reader (BMG Labtech) at 30°C. Mean values ± SD of triplicate repeats are plotted. All strains were grown in LB at 30°C. HT-PBP2B expression was induced with 100 μM IPTG in both strains containing HT-PBP2B, while GFP-FtsZ was not induced in either case (0% xylose).

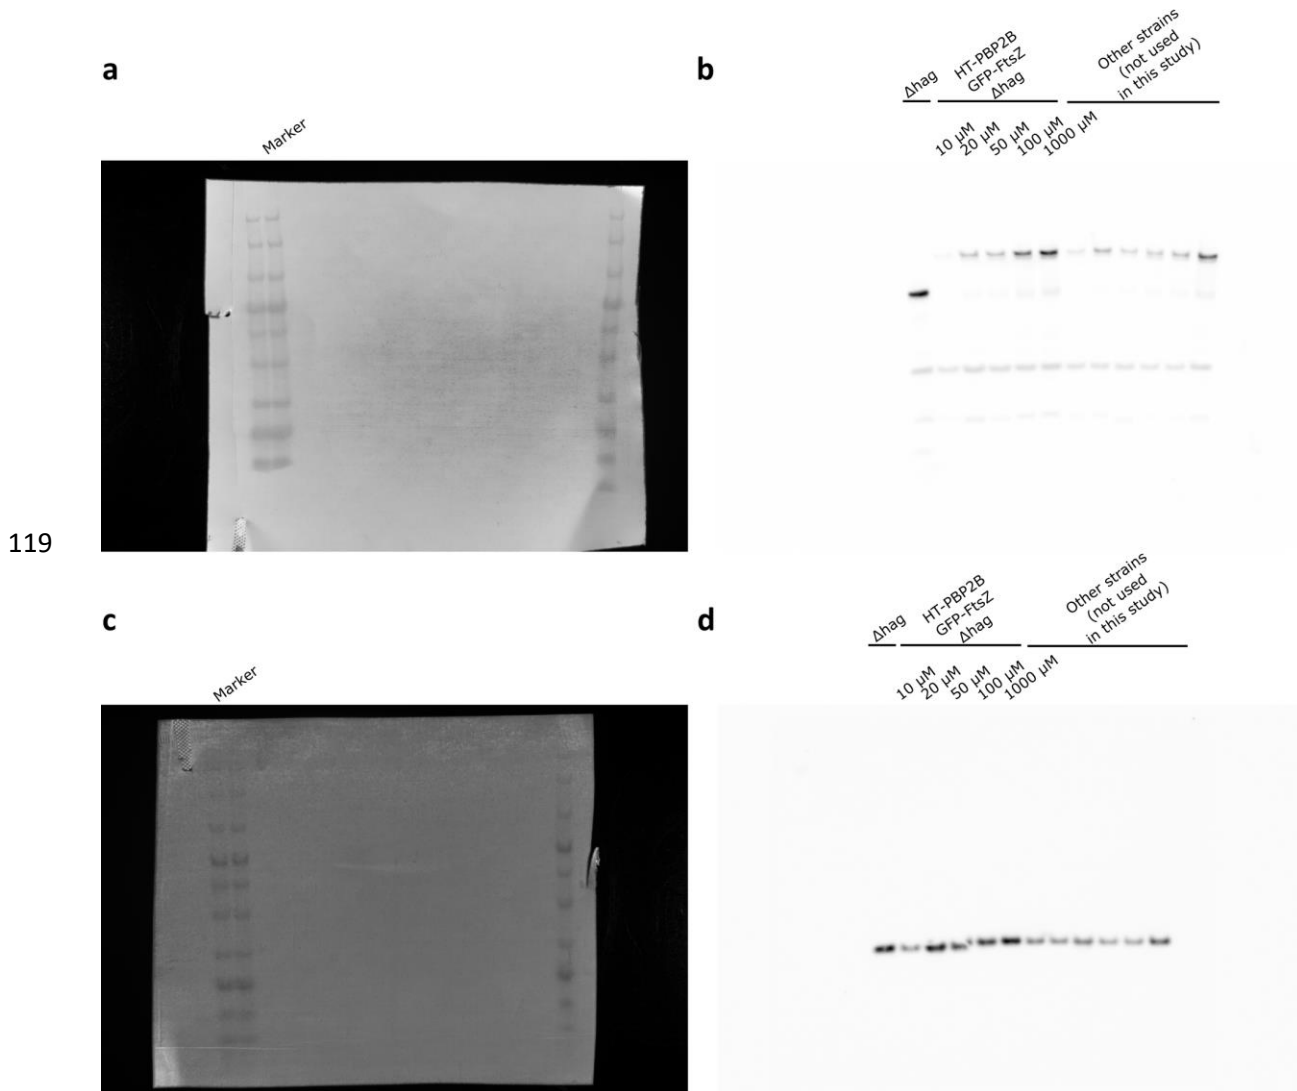

121 **Supplementary Figure 12. Uncropped images of anti-PBP2B and anti-Spo0J Western blots.**  
 122 Uncropped Western blot images of HT-PBP2B GFP-FtsZ  $\Delta$ hag (strain SH147; Supplementary Table 1)  
 123 and  $\Delta$ hag (strain SH211), corresponding to cropped images in Supplementary Figure 2. **(a)** White light  
 124 illumination of anti-PBP2B blot. **(b)** Chemiluminescence of anti-PBP2B blot. **(c)** White light illumination  
 125 of anti-Spo0J blot. **(d)** Chemiluminescence of anti-Spo0J blot.

## 126 REFERENCES

- 127 1. Whitley, K. D. *et al.* FtsZ treadmilling is essential for Z-ring condensation and septal constriction  
 128 initiation in *Bacillus subtilis* cell division. *Nat. Commun.* **12**, 2448 (2021).

129
